# Supplementary material for: Somatic Reversion of a Novel IL2RG Mutation Resulting in Atypical X-Linked Combined Immunodeficiency
Source: MDPI journal article supplement (doi:10.3390/genes13010035), 2021-12-23
Supplement: s1 [file s1]

**Table S1.** Sequence of Primers and Probes.

| Item                   | Name       | Sequence (5' →3' )                                 |
|------------------------|------------|----------------------------------------------------|
| <i>IL2RG</i>           | For primer | AGGCCACACAGATGCTAAAACT                             |
|                        | Rev primer | TGCTACATTCACGTCCCTAGT                              |
| <i>TREC</i>            | For primer | CACATCCCTTTCAACCATGCT                              |
|                        | Rev primer | GCCAGCTGCAGGGTTTAGG                                |
|                        | Probe      | /6-FAM/ ACACCTCTG/ZEN/GTTTTTGTAAGGTGCCCACT/IABkFQ/ |
| <i>KREC</i>            | For primer | TCCCTTAGTGGCATTATTTGATCACT                         |
|                        | Rev primer | AGGAGCCAGCTCTTACCCTAGAGT                           |
|                        | Probe      | /6-FAM/TCTGCACGG/ZEN/GCAGCAGGTTGG/IABkFQ/          |
| <i>RPP30</i>           | For primer | AGATTTGGACCTGCGAGCG                                |
|                        | Rev primer | GAGCGGCTGTCTCCACAAGT                               |
|                        | Probe      | /HEX TTCTGACCT/ZEN/GAAGGCTCTGCGCG /IABkFQ/         |
| <i>STR</i><br>analysis | For primer | CAGGATATTATGTGATGGAATCC-6FAM                       |
|                        | Rev primer | GATCTCTTCTCTCTCTCTCTTTCTCCC                        |

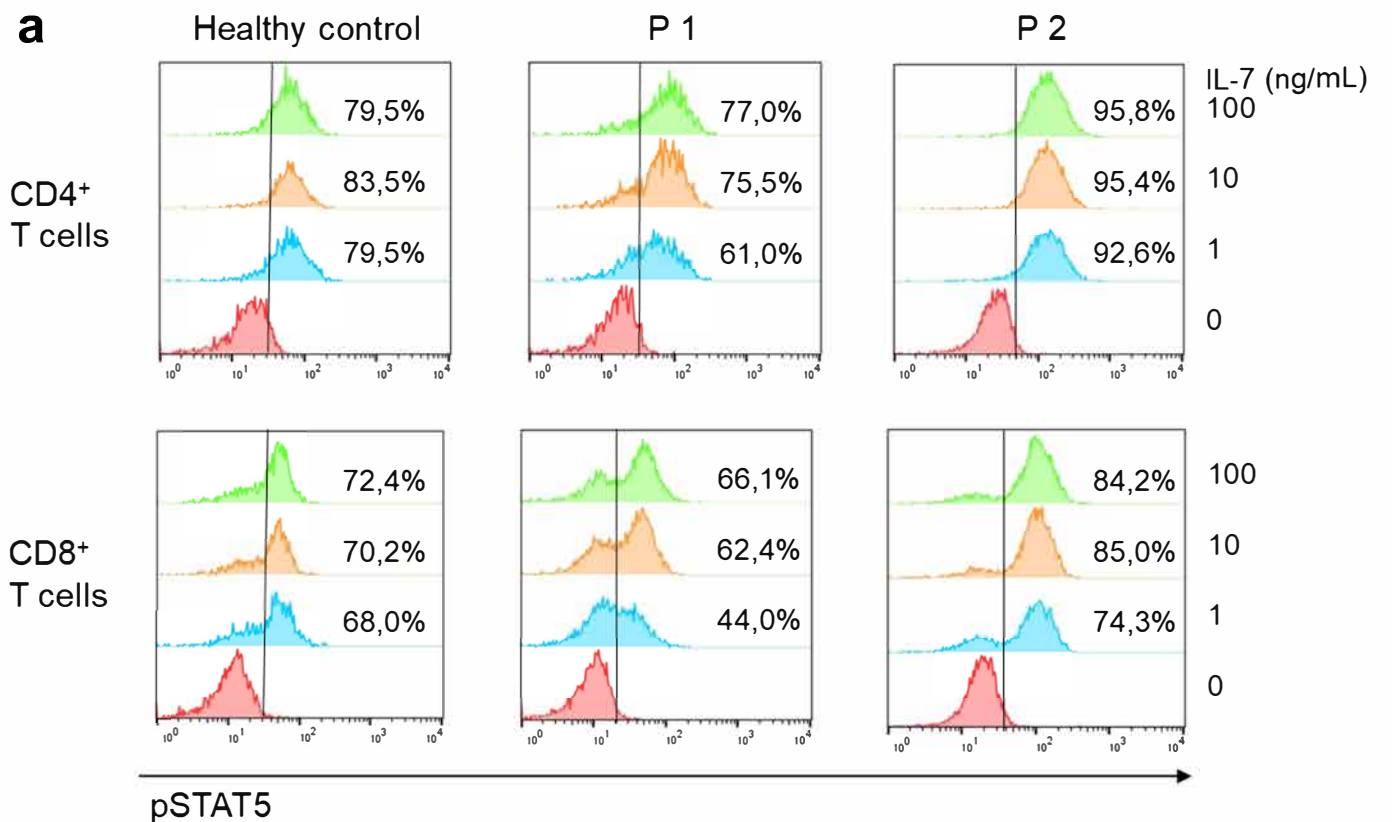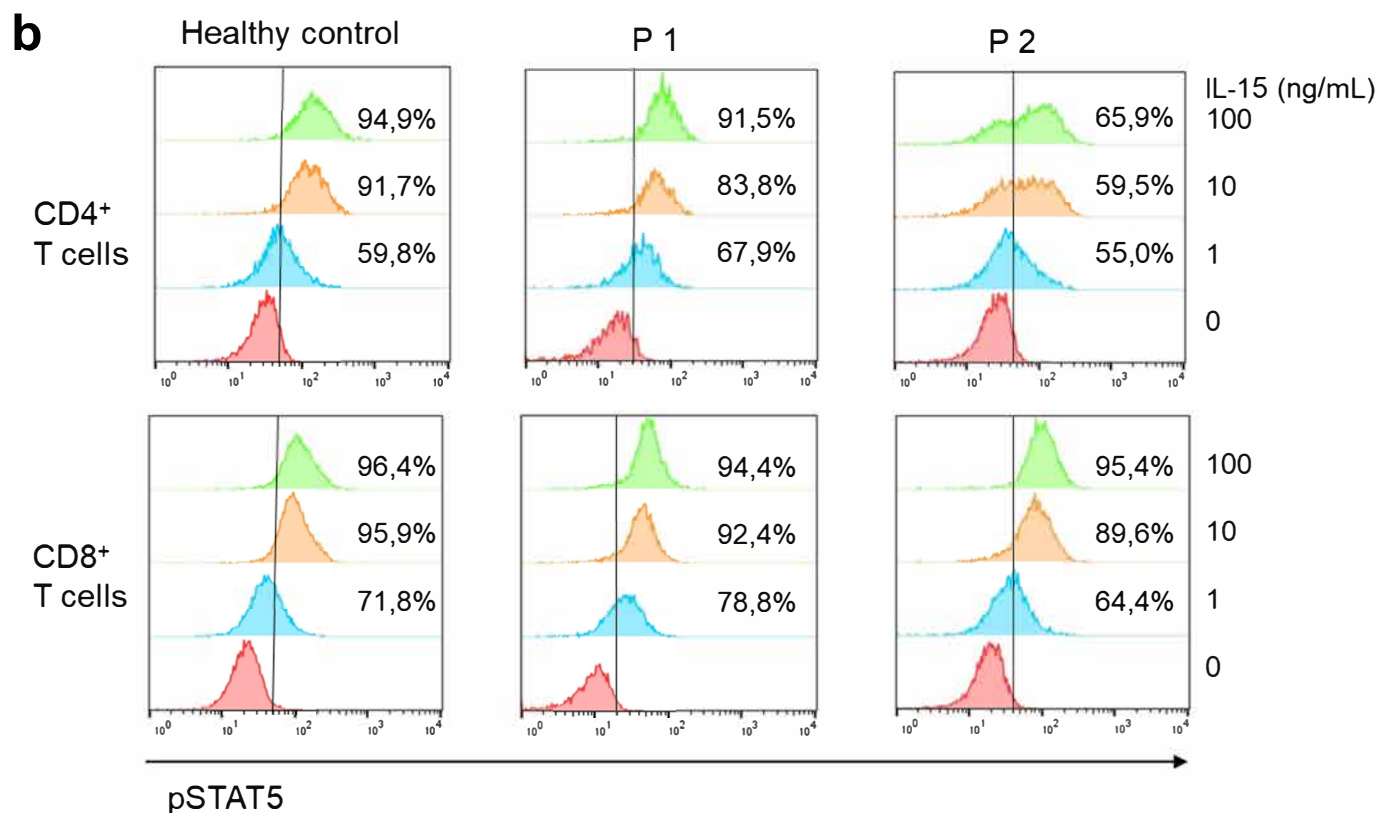

Figure S1. STAT5 phosphorylation with (a) IL-7 and (b) IL-15 using 1, 10, and 100 ng/mL. No significant difference could be observed in STAT5 phosphorylation from patient cells compared to an age-matched healthy control.

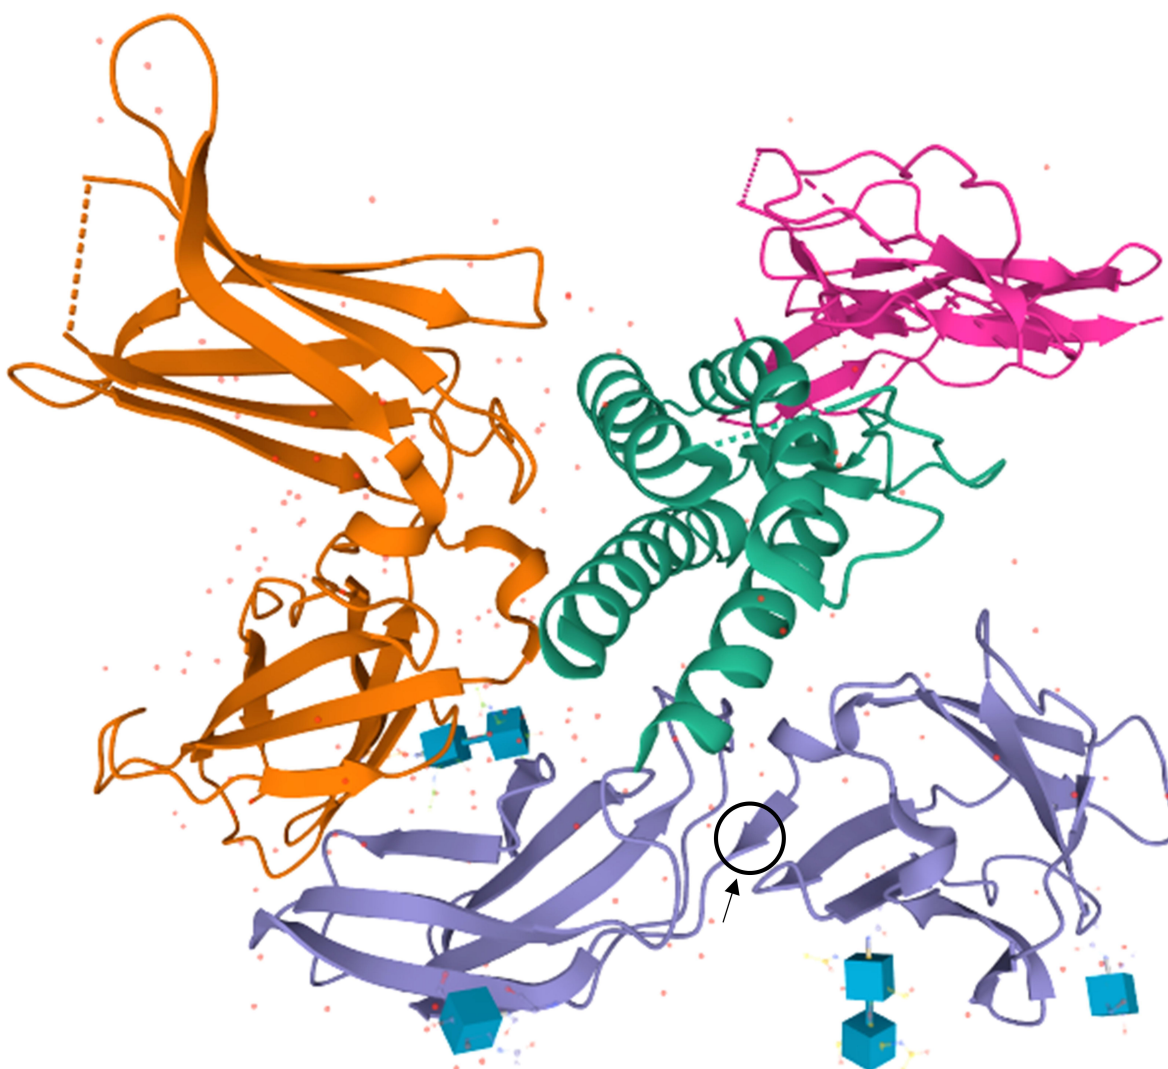

Figure S2. 3D visualization of the molecular interaction of IL-2 binding to IL-2 receptor. IL-2 is depicted in green, IL2RA in blue, IL-2RB in orange and IL-2RG in purple. Isoleucine 153 from IL-2RG (included in a  $\beta$ -sheet motif) is highlighted. The image was generated with Mol\* Viewer application [38] in RCSB PDB (PDB ID: 2B5I [27]). The structure was analyzed by X-ray diffraction (2.30 Å of resolution) by Wang et al. [27].
